# Impact of Gene Copy Number Variation on Anesthesia in *Drosophila melanogaster*

Debasmita P. Alone, Ph.D.,\* Jason C. Rodriguez, B.Sc.,† Cameron L. Noland, B.A.,† Howard A. Nash, M.D., Ph.D.‡

**Background:** Chromosomal deletions and duplications, which result in halving or doubling of copy number in a block of genes, are an important source of variation between individuals. Phenotypic effects of copy number variation are commonly observed, but effects on sensitivity to volatile anesthetics have not been assessed in any organism.

**Methods:** The potency with which halothane depresses the righting reflex of fruit flies was measured in congenic *Drosophila* strains, each of which was heterozygous for a deletion of average size 400 kb. Over 200 strains were examined, thereby scanning approximately half of the fly genome.

**Results:** Although the vast majority of deletion heterozygotes were indistinguishable from the control, eight had significantly altered sensitivity to halothane. Genetic tests supported the hypothesis that the change in anesthetic sensitivity was the result of reduction in copy number and not adventitious mutations in the strains. Among the eight outliers, the difference in halothane potency ranged from a 25% increase to a 15% decrease. Changes of similar magnitude but distinctive patterns were found when these lines were tested with enflurane, isoflurane, and sevoflurane.

**Conclusions:** Variation in gene copy number has a significant impact on anesthetic sensitivity in *Drosophila melanogaster*. The level of transcription of a few genes must thus be limiting for a normal response to volatiles. Coupling between gene copy and gene expression is universal, and the components of the fly's nervous system are highly conserved; therefore, this work provides a rationale for investigating the clinical impact of copy number variation.

THE study of genetic variation in the human population has benefited greatly from the application of sophisticated molecular biologic techniques. The most recent advance is the demonstration that, in addition to variable number tandem repeats and single nucleotide polymorphisms, the chromosomes of individuals differ from each other by deletion or duplication of blocks of DNA that range in size from a few kb to more than 1 Mb.<sup>1</sup> Such rearrangements, which can affect virtually any segment

of the genome, are surprisingly common; the first human to have his genome completely sequenced was found to harbor over 60 such blocks.<sup>2</sup> By definition, deletions and duplications produce a 50% change in the copy number of the affected set of genes. Gene dosage typically regulates the level of gene expression; therefore, copy number variation (CNV) is *a priori* likely to have significant effects on human biology, especially on complicated processes in which a two-fold change in gene expression could be disruptive. Indeed, a handful of human diseases are now known to be associated with duplicated or deleted segments of the genome,<sup>3</sup> and increasing attention is being paid to the possibility that CNV underlies others. A catalog of the genes affected by CNV in the human population has not yet been assembled. However, even in one individual, the list of genes affected by CNV includes an ion channel (KCNN3) and a vesicle trafficking protein (SYT8), both of which are expressed in adult brain.<sup>2</sup> Given the likelihood that the population of surgical patients will harbor copy number variants of many genes that affect neural function, the potential impact of CNV on anesthesia needs to be addressed.

One way to begin such an assessment is *via* a model organism in which gene copies can be manipulated systematically. Past work from our lab and others have shown that the fruit fly, *Drosophila melanogaster*, responds to anesthetics at concentrations comparable to those used in the clinic.<sup>4,5</sup> Moreover, mutations that influence anesthetic endpoints in the fly often map to well-conserved genes that have significant roles in the functioning of the nervous system.<sup>6,7</sup> However, previous studies used strong mutagens; therefore, they may have been biased toward isolation of mutations that severely disrupt gene function. Thus, past work with *Drosophila* does not provide a clear guide to the effects on anesthesia that would be expected from the subtle changes in gene expression that accompany CNV. To address this uncertainty, we tested a collection of over 200 fly strains, each of which has a 50% reduction in the copy number of a substantial block of genes. The results provide the first estimation of the frequency with which such variants influence anesthetic sensitivity and the magnitude of this influence.

This article is featured in "This Month in Anesthesiology." Please see this issue of ANESTHESIOLOGY, page 9A.

This article is accompanied by an Editorial View. Please see: Kelz MB, Friedman E: Anesthetic sensitivity: Learning to fly. ANESTHESIOLOGY 2009; 111:5-7.

\* Research Fellow, † IRTA Fellow, ‡ Senior Investigator and Chief, Laboratory of Molecular Biology, National Institute of Mental Health, Bethesda, Maryland.

Received from the Laboratory of Molecular Biology, National Institute of Mental Health, Bethesda, Maryland. Submitted for publication October 3, 2008. Accepted for publication February 6, 2009. Supported by the Intramural Program of the National Institute of Mental Health, Bethesda, Maryland.

Address correspondence to Dr. Nash: Laboratory of Molecular Biology, Building 35, Room 1B-1002, National Institute of Mental Health, 9000 Rockville Pike, Bethesda, Maryland 20892-3736. howardnash@mail.nih.gov. This article may be accessed for personal use at no charge through the Journal Web site, www.anesthesiology.org.

## Materials and Methods

### *Drosophila Stocks, Crosses, and Transformants*

Flies were grown on cornmeal/molasses agar at 25°C and 50% humidity under a 12:12 light/dark cycle using standard techniques.<sup>8</sup> More than 220 members of the DrosDel collection of deletion stocks<sup>9</sup> were obtained

from the Bloomington *Drosophila* Stock Center at Indiana University, Bloomington, IN. Each of these lines was not only fully characterized at the molecular level but had been constructed so as to maintain the genetic background of the corresponding parental stock. The mean ( $\pm$ SD) and median size of the deleted region in the strains that we tested were, respectively,  $441 \pm 236$  kb and 429 kb; taken together, the deletions affected approximately 50% of the fly genome. For the initial screen of this set, the parental DrosDel line and the deletion stocks derived from it were individually crossed to a derivative of the Canton-S line into which had been introduced a recessive allele, *bar38*, of the narrow abdomen (*na*) gene.<sup>10</sup> The female offspring that were subsequently tested were thus heterozygous both for a particular deletion and for a strong allele of *na*; this was done with three aims in mind. The first was to place the deletion chromosome in *trans* to a standard chromosome rather than the multiply inverted, multiply marked balancer chromosomes<sup>8</sup> present in the original stock. This permitted valid comparisons to be made between deletions that mapped to different chromosomes and thus came with different balancers. The second aim was to provide the tested lines with a wild-type copy of the *white* (*w*) gene; the DrosDel parental and deletion lines all bear an allele of this gene (*w*<sup>1118</sup>), which is known to alter anesthetic sensitivity.<sup>11,12</sup> The final aim was to enable the possibility of finding genes that have a specific interaction with *na*. When homozygous, mutations in this gene confer strong effects on anesthesia sensitivity, but heterozygotes are indistinguishable from wild-type.<sup>10,13,14</sup> We reasoned that, if *na* function depended on a component that was present in limiting amounts, a strain that was heterozygous both for *na* and the gene encoding such a putative component might be uniquely altered in anesthetic sensitivity. Although this possibility was examined whenever an anesthetic phenotype was suspected, we did not find such an enhancer locus: heterozygosity for *na* was not essential for the effects we found. Accordingly, the final analysis of outlier DrosDel deletions was done after crossing them to the parental Canton-S line rather than to the *na* mutant derivative of it. Similarly, selected deletion lines (also obtained from the Bloomington Stock Center) from the Exelixis collection<sup>15</sup> were evaluated relative to the Exelixis parental line for the presence of dosage-sensitive loci by crossing to Canton-S and testing nonbalancer female offspring.

To evaluate the ability of transgenes to overcome the effect of a particular heterozygous deletion, we used a commercial service (Genetic Services, Inc., Sudbury, MA) to introduce by standard techniques<sup>16</sup> the DNA segments described below (Plasmid Constructs) into the genome of a *w*<sup>1118</sup> derivative of our Canton-S line.<sup>11</sup> For each plasmid construct, we isolated several transformants, at least one on each of the two autosomes. The white eye color of the parental line permitted facile

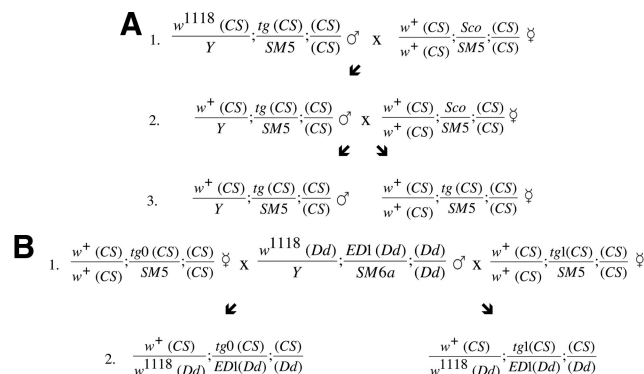

**Fig. 1. Genetic manipulations with transgenes. (A) Replacing the X chromosome of the original transformant lines with a wild-type X chromosome.** Each line diagrams a cross between males ( $\sigma$ ) and virgin females ( $\phi$ ) of the indicated genotype. Chromosomes that derive from the Canton-S line are indicated as CS; individual genetic elements that distinguish these chromosomes are indicated (*w* = white; *tg* = transgene). The crossing scheme relies on the use of a balancer, a chromosome in which the normal complement of genes has been severely rearranged to prevent recombination with a homologous chromosome.<sup>8</sup> In the example shown, the *SM5* balancer carries a dominant marker that yields curly wings; this marker is a recessive lethal, so it is maintained as a heterozygote with a chromosome that carries a dominant bristle marker, *Sco* (detailed descriptions of these markers and the balancer can be found at FlyBase<sup>41</sup>). In each of the two crosses shown, selection for the Curly phenotype and against the *Sco* phenotype insures inheritance of the transgene. **(B) Testing rescue of an anesthesia phenotype by transgenes.** Males that are heterozygous for the *ED1* deletion (made in the DrosDel (Dd) genetic background)<sup>9</sup> are crossed (line 1) to females bearing a transgene. The latter are the offspring from a stock made by crossing males and females from line A3. In the examples shown, the transgene either carries no genomic DNA (*tg0*) or carries a partial segment of the genomic region under the *ED1* deletion (*tg1*). The female offspring from these crosses (line 2) are assayed for halothane sensitivity in the distribution test; comparison of the resulting EC<sub>50</sub> values indicates the extent of rescue. Another control (not shown) is generated by using males from the DrosDel parental line instead of *ED1* males.

detection of individuals that inherited the transgene, which carries a miniaturized version of *white* and partially restores red eye color. However, *miniwhite* lacks many features of the natural gene; therefore, it cannot be relied upon to overcome the anesthesia defects associated with the *w*<sup>1118</sup> mutation.<sup>11,12</sup> Thus, using the crossing scheme outlined in figure 1A, for each transformant line we replaced the X chromosome (bearing the *w*<sup>1118</sup> allele) with that from wild-type Canton-S. The resulting lines were then crossed to the deletion line, and the desired offspring were tested (fig. 1B). The experiments presented in the text were carried out with transformants bearing transgenic inserts on chromosome II, but comparable results were also obtained with transformants bearing inserts on chromosome III (data not shown).

#### Plasmid Constructs

The vector used for our studies was CaSpeR4 (GenBank Accession x81645), a plasmid engineered to facilitate the creation of transgenic lines of *Drosophila*.<sup>16</sup>

Fig. 2. Creation of rescue constructs by recombineering. At the *top left* is shown a vector used to retrieve sequences from the bacterial artificial chromosome (BAC) shown at the *top right*. Some key features of the vector are marked. These include the two ends (5'P and 3'P) of a P transposable element<sup>16</sup> and a pair of "homology arms" (A and B) whose sequences come from the two ends of a region of interest (*r.o.i.*) within the BAC. Upon introduction by electroporation of a *Bam*HI-linearized vector into a BAC-containing strain that has been engineered to overexpress recombination proteins, gap repair by homologous recombination promotes the transfer to the vector of the entire segment of the BAC that lies between the arms. Two attractive features of this recombineering (recombination-mediated genetic engineering) procedure<sup>42</sup> is that it does not depend on fortuitously placed restriction sites (any sequence from the BAC can be amplified and cloned as a homology arm) and that it employs the natural replication machinery of *Escherichia coli* to achieve the transfer of genetic information and thus is much less prone to introduction of errors than polymerase chain reaction-based methods.

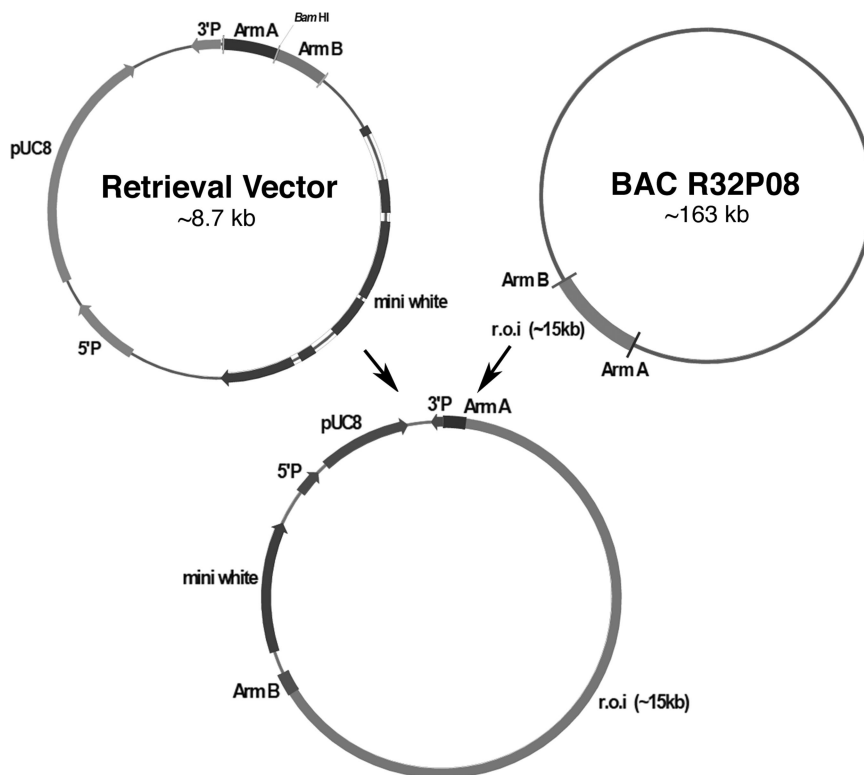

The key feature of this vector is a pair of transposon ends that, with the aid of a source of transposase that is coinjected with the vector into fertilized eggs, direct the insertion into the *Drosophila* genome of the segment of DNA that lies between the ends. To introduce 15- to 20-kb segments of the *Drosophila* genome into CaSpeR4, we used a recently described recombineering procedure.<sup>17</sup> First, we used polymerase chain reaction to amplify an approximately 500-bp fragment from each end of the desired insert. These were cloned using conventional techniques to create a derivative of CaSpeR4 in which the two "homology arms" were adjacent to each other and separated by a unique *Bam*HI restriction site (fig. 2). This so-called retrieval vector was then linearized at the unique site and transformed into a derivative of the recombination-proficient *Escherichia coli* strain SW102.<sup>18</sup> To make this derivative, we introduced into SW102 a bacterial artificial chromosome, chosen from the Berkeley collection<sup>19</sup> because it bears an approximately 160-kb segment of the *Drosophila* genome that encompasses all the material deleted in the DrosDel ED1 line. Within the transformed bacteria, recombination between homologous sequences initiates a repair process in which the retrieval vector is restored to a circular form that incorporates the segment between the homology arms from BACR32P8 (fig. 2). The ensuing plasmids were examined by restriction digestion and by polymerase chain reaction amplification of *Drosophila* genes

from the region of interest; correct constructs were amplified and purified by conventional techniques.

### Anesthetics

Halothane is obtained from Halocarbon Laboratories (River Edge, NJ), sevoflurane and isoflurane are from Abbott Laboratories (North Chicago, IL), and enflurane is from Baxter Healthcare Corp (Deerfield, IL). These agents were volatilized using Gas Washing Bottles (Fisher Scientific, Pittsburgh, PA) to bubble air through liquid anesthetic; the resulting stream was mixed with air that had been humidified in the same way. The concentration of anesthetic delivered to the glove box (total flow, approximately 10 l/min) was monitored using a MIRAN M1ACVF-A single beam infrared spectrometer (Invensys Process Systems, Plano, TX). The spectrometer was calibrated with standards made by injecting precise quantities of liquid anesthetic into a large vessel of known volume; after volatilization was complete, the mixture was pumped through the spectrometer. This calibration was repeated at 6-month intervals, with little or no adjustment required.

### Tests of Anesthesia Sensitivity

Flies that were 3 to 7 days old were collected and sorted in groups of 10–12 under carbon dioxide anesthesia and allowed to recover for 1 to 2 days. Without further recourse to anesthesia, they were then transferred from food vials to testing vials (50-ml Falcon tubes perforated with tiny holes to permit gas exchange but

§ Available at: <http://www.fruitfly.org/data/sequence/release3/BACR32P08>. Accessed December 29, 2008.



retain flies), which were then placed in a glove box. After equilibration with a fixed concentration of volatile agent for 30–70 min, the flies were examined for their ability to escape the conical bottom of the testing vial after three brief mechanical shocks. This assay of a fly's righting and climbing reflex, also known as the distribution test,<sup>10,11</sup> was quantified as the minimum number of flies found at the bottom during a 1-min trial. Typically, each vial of flies was tested sequentially at increasing concentrations of drug, with an additional equilibration period of 30–70 min for each new concentration. This procedure was adopted for the following reasons. First, flies do not feed during the assay and, although the anesthetic is delivered in humidified air, are in danger of becoming dehydrated and/or starved after several hours in the glove box. Second, the exchange of gases in insects like fruit flies is primarily passive, *via* diffusion through blunt-ended trachea that start at the cuticle and ramify throughout the internal organs. Washout to the baseline is thus predicted to be asymptotic and, at least as judged by observation of behavior, appears to be quite slow. To maximize the amount of useful information obtained within a fixed time window, we tested flies at incrementally higher concentrations (stair-stepping) without interposing no-anesthesia intervals between them. This procedure is reliable and reproducible; moreover, in the few cases tested, it yields EC<sub>50</sub> values that are similar to those obtained with a procedure in which no fly is tested at more than one concentration.<sup>10,12</sup>

The initial screen of deletion heterozygotes was done with groups of 20–25 lines, 3 vials of flies per line, which were tested together with 10–15 vials of the control heterozygote. In total, 220 DrosDel strains were tested: 39 carried deletions of material from the X chromosome, 42 from the 2L autosomal arm, 35 from 2R, 53 from 3L, and 51 from 3R. The complete list of tested strains is available upon request. As a compromise between throughput and detection, each line was tested at only three concentrations of halothane. For most of the survey, these were 0.30%, 0.375%, and 0.45%, concentrations that induced approximately 10 to 80% failure of reactive climbing in control flies. For each line tested, a crude estimate of potency (EC<sub>50</sub> value) was derived by a logit analysis.<sup>20</sup> We focused on those deletion heterozygotes that gave an initial estimate of EC<sub>50</sub> that differed by at least 10% from the value deduced from the contemporaneous dataset for the control heterozygote. This criterion reflected our assessment of the uncertainty in the calculated potency values. To begin this assessment, we treated individual datasets from the control heterozygote as if they were obtained both from control and a deletion line; *i.e.*, we compared a dataset from the control heterozygote to itself. The 95% confidence limits on the resulting potency ratio typically were 0.97 to 1.03. Consistent with this estimate is the fact that, when all 18 EC<sub>50</sub> values determined for the control heterozygote

throughout the course of this study were compared to each other, the coefficient of variation around the mean value of 0.385% halothane was 0.057. Although these estimates might have encouraged focusing on deletion heterozygotes that differed from control by  $\pm 5\%$ , as noted above in Tests of Anesthesia Sensitivity, each deletion heterozygote was tested with 4–5 times fewer flies than the control. This fact, which reflected the need to manage the manpower cost of the project, meant that the proportion of flies that failed the distribution test was less precisely determined for the deletion than the control heterozygotes. Accordingly, we expanded the “gray zone,” in which we ignored potential differences between lines, to include EC<sub>50</sub> values that differed from control by  $\pm 10\%$ .

Lines that passed this initial test were retested by using fresh offspring from the cross. This eliminated about half of the initial candidates and focused our attention on 12 of the 220 lines. These were subjected to a final evaluation, in which one set of vials (comprising 24 to 48 animals) was tested at four concentrations of halothane (0.10%, 0.20%, 0.30%, and 0.35%), and a second set of the same genotype was tested at four higher concentrations (0.40%, 0.50%, 0.60%, and 0.70%). The eight lines that differed from control in this evaluation were subsequently evaluated in separate rounds of testing for sensitivity to enflurane, isoflurane, and sevoflurane.

### Statistical Analysis

All statistical comparisons were made on the basis of a logit analysis<sup>20</sup> of 8-point concentration-response curves using a commercial software package (SPSS Inc, Chicago, IL). The input for such analyses were experiments performed in parallel on a group of deletion heterozygotes and the relevant control heterozygote. The output consisted of maximum likelihood estimates for two parameters that describe concentration-response curves. The first parameter characterized the slope or steepness of the curves; here, a single value was calculated that best fit all the lines tested. The second parameter provided distinct estimates of potency for each line. These were presented in two forms: (1) EC<sub>50</sub> values and 95% confidence limits for each strain; (2) potency ratios (EC<sub>50</sub> for strain x/EC<sub>50</sub> for strain y) and 95% confidence limits for each pair of strains. The shift in EC<sub>50</sub> was calculated from the control heterozygote/deletion heterozygote potency ratio (R) as  $100 \times [(1/R) - 1]$ . The 95% confidence limits on this shift were similarly calculated from the corresponding limits provided for R. Significant differences were assigned to those deletion heterozygotes for which the confidence limits on the shift in EC<sub>50</sub> from that of the control heterozygote were entirely above or below zero. For the rescue construct strains, significant differences between relevant pairs were assigned if the confidence limits on their EC<sub>50</sub> values did not overlap.

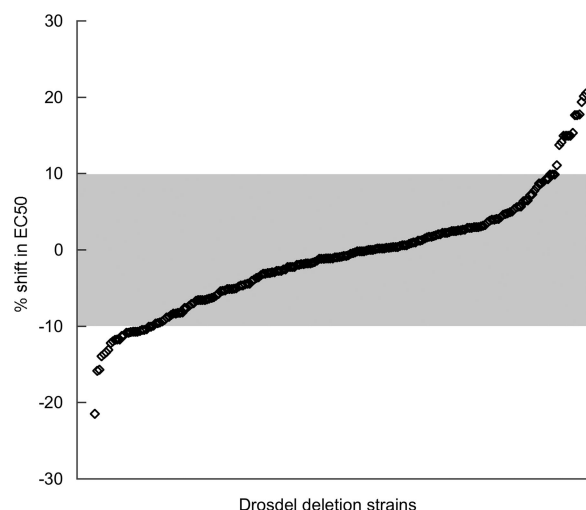

Fig. 3. A survey of the effect of copy number variation (CNV) on halothane potency.  $EC_{50}$  values for 220 deletion heterozygotes were estimated as described in Materials and Methods. Each strain was assigned a rank on the basis of the percentage difference between its  $EC_{50}$  value and that determined in parallel for the control strain. The figure presents these differences as a function of rank number. Note that at least 90% of the strains cannot be reliably distinguished from control line because the shift in their  $EC_{50}$  falls within the region of experimental uncertainty (gray shading).

## Results

Our study was made possible by the existence of a collection of *Drosophila* strains bearing chromosomal deletions.<sup>9</sup> Many of these variants were crossed to a laboratory stock to generate a large set of deletion heterozygotes, each distinguished by a single contiguous block of genes in which copy number was reduced from two to one. We exposed each of these strains to a few concentrations of halothane and measured the effect of the drug on the ability of flies to right themselves and climb after a brief mechanical shock.<sup>10</sup> From this, we estimated an  $EC_{50}$  value and compared it to the comparable value for a control strain. As seen in the overview shown in figure 3, the vast majority of strains have  $EC_{50}$  values that fall into the range that cannot be reliably distinguished from the control; if CNV in these strains produces an effect on anesthesia, it is too small to be detected by our methods. We conclude that, at least in this model organism, subtle changes in gene expression are not a ubiquitous source of variability in anesthetic responsiveness.

It is also evident from figure 3 that, against the featureless background formed by most of the strains, a few deletion heterozygotes appear to show significant effects of CNV on the response to halothane. We retested these outliers; those that held up were then studied over a wide range of concentrations. As typified by the examples shown in figure 4, this proved that several strains have *bona fide* alterations in halothane  $EC_{50}$ . A few facts stand out from the detailed examination of the outliers that we have studied most carefully (table 1). First, none

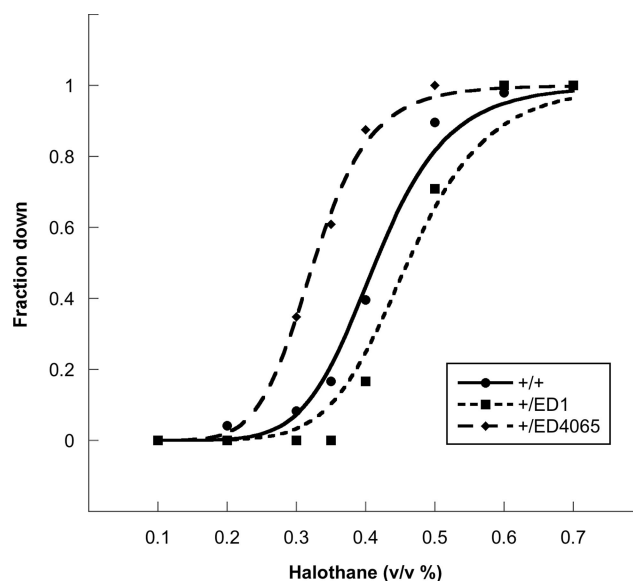

Fig. 4. Representative concentration-response curves for the halothane-induced loss of the righting/climbing reflex. The data for the control strain (+/+) and two deletion heterozygotes (+/ED1 and +/ED4065) were fitted to the logistic function, resulting in a common slope coefficient of 7.9 and  $EC_{50}$  values, respectively, of, 0.40, 0.46, and 0.32.

of the effects are large. Although we have examined deletions that span over half of the fly genome, the biggest shift in  $EC_{50}$  seen is approximately 25%. Second, relative resistance to halothane is detected with similar frequency to halothane hypersensitivity. The rough parity between increased and decreased sensitivity argues that CNV is not just making flies sick, because this would be expected to favor hypersensitivity. Third, as described in Materials and Methods, the initial screen used strains that were heterozygous not only for a deletion but also for a strong allele of a gene (*na*) that influences

Table 1. Summary Information on Deletions with Unequivocal Effects on Halothane Sensitivity

| Strain Designation | Location of Deletion (Chromosome Arm: Genomic Coordinate) | Deletion Size (bp) | $\Delta$ Potency (95% CL) |
|--------------------|-----------------------------------------------------------|--------------------|---------------------------|
| +/ED4065           | 2R:20290189                                               | 540,173            | -19.7% (-13.0 to -26.9)   |
| +/ED5495           | 3R:5996223                                                | 716,259            | -25.0% (-15.6 to -35.9)   |
| +/ED2247           | 2R:7487611                                                | 388,614            | -16.7% (-10.2 to -23.6)   |
| +/ED2308           | 2R:8667875                                                | 216,614            | -16.6% (-10.1 to -23.5)   |
| +/ED1725           | 2R:3501429                                                | 542,121            | +9.9% (+4.9 to +15.4)     |
| +/ED1715           | 2R:3214456                                                | 589,972            | +9.2% (+4.2 to +14.5)     |
| +/ED1              | 2R:12914232                                               | 70,595             | +16.1% (+10.6 to +22.5)   |
| +/ED2751           | 2R:12744676                                               | 240,132            | +15.6% (+10.1 to +21.8)   |

The designated name indicates that the tested strains are heterozygotes between a strain without a deletion (+) and a strain (ED#) from the DrosDel collection carrying a deletion with the indicated number. The startpoint of each deletion is given with reference to the coordinate system of *Drosophila* Genome Release 5.1 (GenBank Accession AE013599.4 and AE014297.2). The change in potency of the deletion heterozygotes relative to the control heterozygote (+/parental ED line with no deletion) is deduced from eight-point concentration-response curves. These values, together with their 95% confidence limits (CL), are calculated as described in Materials and Methods from the potency ratios derived from a logit analysis of the data.

**Table 2. Transgenic Rescue of the Anesthesia Phenotype in a Deletion Heterozygote**

| Row | Deletion Carried by Parent 1 | Content of Transgene Carried by Parent 2 | Halothane EC <sub>50</sub> , v/v% (95% CL) |
|-----|------------------------------|------------------------------------------|--------------------------------------------|
| 1   | None                         | None                                     | 0.388 (0.378–0.399)                        |
| 2   | <i>ED1</i>                   | None                                     | 0.434 (0.423–0.446)                        |
| 3   | <i>ED1</i>                   | 2R:12945571–12967489                     | 0.426 (0.415–0.437)                        |
| 4   | <i>ED1</i>                   | 2R:12973364–12988824                     | 0.373 (0.364–0.384)                        |

Each row of the table contains information about a line of flies made by crossing a strain from the DrosDel collection (either the parental stock or the *ED1* deletion derived from it) to a transgenic derivative of the Canton-S strain (for a diagram of the crossing scheme, see fig. 1). The transgene either consisted of an empty vector (rows 1 and 2) or (in rows 3 & 4) the same vector modified by the addition of a segment of the region deleted in *ED1* (see fig. 2 for an outline of this construction). The potency with which halothane depressed the climbing ability of the offspring from these crosses was determined from eight-point concentration-response curves and is expressed as an EC<sub>50</sub> value. Comparison of the EC<sub>50</sub> values in rows 2 and 4 shows that an extra copy of an approximately 15-kb region can restore the sensitivity of an *ED1* heterozygote to a level that is indistinguishable from that of wild-type flies (row 1). The specificity of the rescue is demonstrated by the failure of a different segment from the *ED1* region to produce this effect (compare rows 2 and 3).

anesthetic sensitivity in flies. However, in no case did we find a deletion whose effect was the result of a genetic interaction with the *na* gene, and the data in table 1 therefore come from strains that were simply heterozygous for the indicated deletion. If there are genes that interact with *na*, more sensitive methods will have to be used to find them. Fourth, most of the deletions that yielded a reliable phenotype map to one chromosome arm, but all the arms of the fly genome were well represented in the set of tested deletions. Therefore, even if one assigns a single count to pairs of very tightly linked hits, the distribution appears to be nonrandom. Although we have no clear explanation for this phenomenon, we wonder if the centromere-proximal portion of 2R (the locus of six of the seven hits in this arm) is less able than other regions to compensate for reduced gene dosage.<sup>21</sup>

Taken at face value, the data shown in table 1 and figure 4 suggest that CNV has a definite influence on anesthesia. However, an alternative hypothesis is that the anesthetic phenotype of the listed strains is not the result of the deletions they contain but of adventitious mutations that they harbor. Such mutations might have been introduced during the original construction of the deletion line<sup>9</sup> or might have arisen in the deletion line during subsequent passages.<sup>22</sup> We have used two strategies to confront this possibility. The first is based on the rationale that, if a deleted region is responsible for the anesthetic phenotype, then putting an extra copy of that region at some other location in the genome should reverse the phenotype. Indeed, a transgene bearing a portion of the region missing in *ED1* fully reverses the halothane resistance associated with this deletion (table 2). The larger size of the other deletions in table 1

encumbered the rescue strategy and prompted the use of a complementary approach; if the original effect is actually the result of removal of one or more genes from the indicated region, then the effect should be recapitulated by a different deletion that also removes this critical block. Accordingly, for several of the regions implicated in table 1, we acquired and tested independently derived strains<sup>15</sup> that contain deletions with at least one endpoint in the region of interest. Figure 5 provides an example of this approach by comparing the effect of a deletion from the original collection (*ED2308*) with the effect of independently derived deletions that remove DNA from the same chromosomal region. A comparable level of halothane hypersensitivity is observed in each case; a similar outcome has been obtained after examination of deletions from within the region of reduced copy number in strains *ED4065/+* and *ED2247/+* (Dongyu Guo, Ph.D., Research Fellow, Laboratory of Molecular Biology, National Institute of Mental Health, Bethesda, Maryland; verbal communication, July, 2008). Although some of the deletions of table 1 have not been examined with either strategy, the success of our initial trials indicates that adventitious mutations do not seriously confound the conclusion that variation in gene copy number produces significant changes in halothane sensitivity.

Diverse volatiles often display differential effects on molecular and cellular systems.<sup>23–25</sup> Reflecting this complexity, previous studies have found that the effect of a point mutation on sensitivity to one anesthetic is not a good predictor of its effect on other volatiles.<sup>26,27</sup> To see if the subtler effects of CNV also display agent-specificity, we tested the strains described in table 1 for sensitivity to anesthetics other than halothane. On the one hand, some of the dosage-sensitive regions, (e.g., that which is deleted in *ED4065*) affect all volatile agents equivalently (table 3). This could imply the presence of genes within the deleted segments that contribute to processes affected by all agents, but it is hard to rule out the possibility that uniform hypersensitivity is merely the result of subtle defects in baseline locomotor performance that are enhanced under the stress of anesthesia. On the other hand, some CNVs show clear evidence of agent-specificity and thus, by definition, cannot have suffered a change in baseline performance. For example, the segment deleted in *ED2247* seems important for sensitivity to halothane and enflurane but not isoflurane and sevoflurane (table 3). In these cases, it appears that there are genes for which expression is limiting for the operation of neural circuits that are disparately affected by different volatile agents. A powerful way to find such circuits is to identify the critical genes within the deleted segments and to then determine where they must be expressed to influence anesthesia sensitivity.

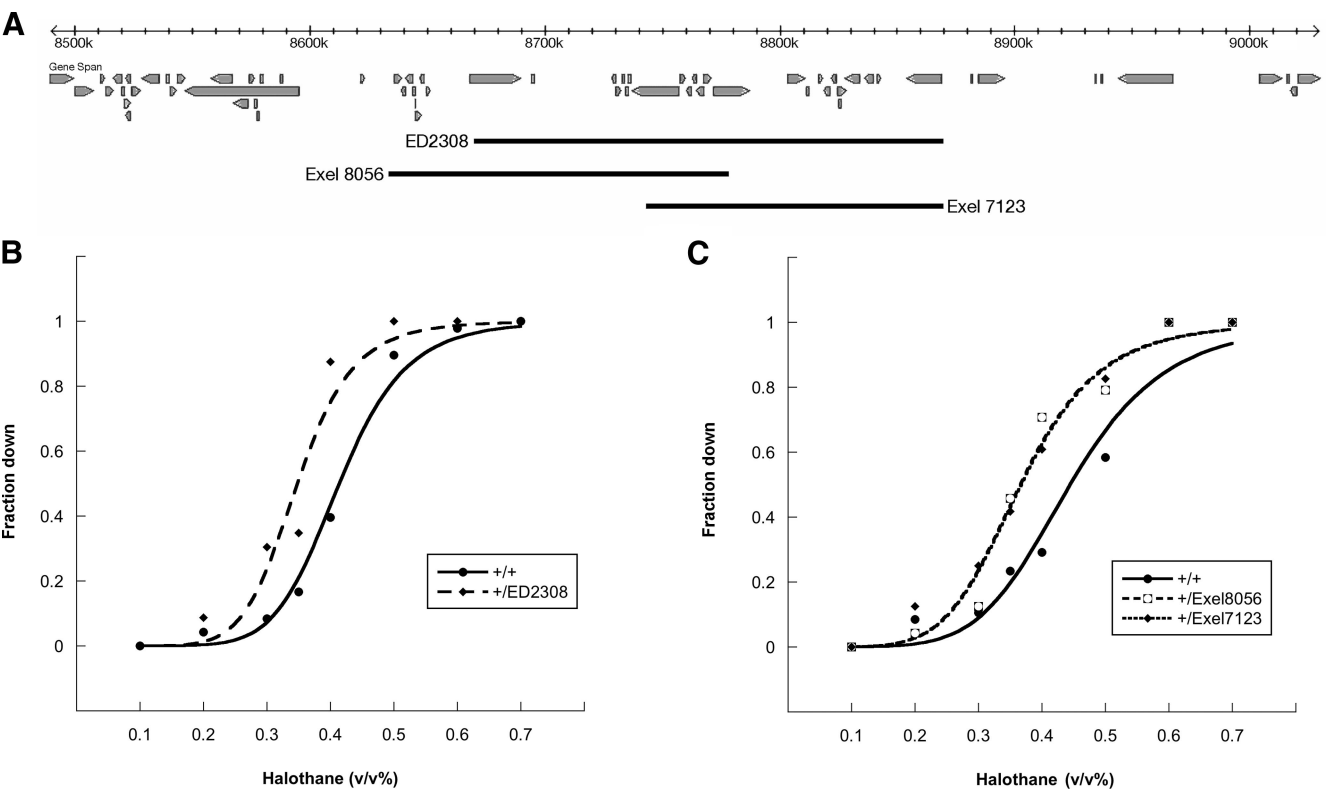

**Fig. 5.** Hypersensitivity to halothane associated with multiple deletions involving one region of the genome. (A) An overview of a 540-kb segment of chromosome arm 2R. Beneath the *scale ruler* is shown the rough position of genes predicted§ to lie in this region, the extent of the DrosDel *ED2308* deletion described in table 1, and the extent of two independently derived deletions from the Exelixis collection. (B and C) Concentration-response curves. The tested lines were generated by crossing the Canton-S wild-type strain to the indicated deletion strain or, in the case of the control heterozygotes, to the parental line from which the deletion was derived. Halothane sensitivity was assessed as described in Materials and Methods. Compared to the corresponding control line (+/+), there is a leftward shift in the EC<sub>50</sub> value of the DrosDel heterozygote (B) and both of the heterozygotes made with deletions from the Exelixis collection (C). The magnitude of this shift for +/*ED2308*, +/*Exel8056*, and +/*Exel7123* is 16.6%, 17.7%, and 17.3%, respectively.

§ Available at: <http://flybase.org/cgi-bin/gbrowse/dmel/?name=2R:8490000.9029346>; Accessed December 29, 2008.

Discussion

In this work, we have used genetically engineered strains of *Drosophila* to mimic the kind of variation in gene copy number that is found in the human population. Our results show that a small fraction of such variants do have a significant impact on sensitivity to

anesthetics and thus focus attention on this recently appreciated type of polymorphism.

CNVs are thought to arise by “unequal crossing-over”, *i.e.*, recombination between perfect or near-perfect repeats that are located 10–1000 kb apart.<sup>28</sup> Repeated DNA is a common genomic feature, and homologous recombination is part of the normal process of meiosis;

**Table 3.** Spectrum of Anesthetic Effects in Deletion Heterozygotes that Show an Altered Sensitivity to Halothane

| Strain/Genotype  | Enflurane               | Isoflurane              | Sevoflurane             |
|------------------|-------------------------|-------------------------|-------------------------|
| +/ <i>ED4065</i> | –27.0% (–20.1 to –34.2) | –28.7% (–22.7 to –35.3) | –20.3% (–16.0 to –24.9) |
| +/ <i>ED5495</i> | –13.2% (–7.8 to –19.7)  | –13.1% (–9.5 to –16.9)  | –22.1% (–18.0 to –26.6) |
| +/ <i>ED2247</i> | –14.7 (–9.1 to –21.7)   | +0.3% (–4.7 to +6.0)    | +0.7% (–2.9 to +4.7)    |
| +/ <i>ED2308</i> | –10.1% (–5.1 to –15.3)  | –1.7% (–4.3 to +0.9)    | –7.0% (–3.6 to –10.4)   |
| +/ <i>ED1725</i> | +2.9% (–2.2 to +8.5)    | +2.7% (0.0 to +5.6)     | 0.0% (–3.8 to +3.6)     |
| +/ <i>ED1715</i> | +1.3% (–3.8 to +6.8)    | +2.4% (–0.3 to +5.3)    | –3.2% (–6.7 to +0.4)    |
| +/ <i>ED1</i>    | –2.8% (–7.7 to +2.2)    | +1.0% (–1.6 to +3.7)    | –0.9% (–4.5 to +2.9)    |
| +/ <i>ED2751</i> | –14.4% (–9.2 to –20.0)  | +1.0% (–1.6 to +3.7)    | –2.6% (–6.1 to +1.0)    |

The strains described in table 1 were tested for sensitivity of the righting/climbing reflex to enflurane, isoflurane, and sevoflurane. The protocol for testing was exactly as described in Materials and Methods for construction of concentration-response curves for halothane, except that the following sets of concentrations were used. For enflurane: 0.10%, 0.20%, 0.30%, and 0.35% plus 0.40%, 0.50%, 0.60%, and 0.70%. For isoflurane: 0.10%, 0.20%, 0.30%, 0.40%, and 0.43% plus 0.45%, 0.48%, 0.50%, and 0.60%. For sevoflurane: 0.10%, 0.30%, 0.50%, 0.60% and 0.75% plus 0.65%, 0.70%, 0.78%, and 0.90%. For each of these agents, the percent change in potency from the control heterozygote and the 95% confidence limits (CL) on this value, calculated as in table 1, is given.



therefore, it is expected that CNVs will be generated with considerable frequency. One might have imagined that selection pressures would severely limit the survival of such variants, so the surprise from recent studies of these aberrations is their prevalence. A recent hybridization study designed to examine this issue stringently for 30 individuals found approximately 1,000 instances of CNV,<sup>29</sup> consistent with the frequency found in the two individuals whose entire genome has been scrutinized by DNA sequencing.<sup>2,30</sup> Although spontaneous CNVs have also been found in *Drosophila*,<sup>31,32</sup> the deletions used in our study were made by expression of a foreign site-specific recombinase to promote unequal crossing-over between selected repeats that had been artificially placed in the genome.<sup>9</sup> Nevertheless, in terms of size and ubiquity, the deletions we used in this paper mimic CNVs found in nature.

The conventional rationale for expecting a close relationship between copy number of a gene and its expression is straightforward: (1) gene expression is often limited by the amount of message per cell, and (2) for a given concentration of active RNA polymerase in a cell, transcription is often limited by the amount of template.<sup>33</sup> The classic evidence supporting this rationale was the discovery that amplification of the dihydrofolate reductase (DHFR) gene in cultured mouse cells is accompanied by a corresponding increase in DHFR message and, ultimately, enzymatic activity.<sup>34</sup> Similarly, amplification of an esterase gene in mosquitoes is associated with a corresponding increase in expression.<sup>35</sup> Despite the abundant historical evidence for correlation between copy number and gene expression, it must be acknowledged that the coupling is not perfect. For example, in a recent study of gene expression phenotypes, for some 90 human genes that displayed CNV, the correlation coefficients relating expression level and copy number were generally low.<sup>36</sup> The weak association may result in part from the methodology used in such a large-scale study, but it could also reflect the operation of compensatory mechanisms that blunt the effect of a two-fold change in copy number on message level.<sup>21</sup> Nevertheless, the association of CNV with disease states<sup>3</sup> proves that compensation is not uniformly effective, and reduction in gene copy number can produce significant changes in human health. Similarly, classic studies of segmental aneuploidy in *Drosophila* provide many examples of a tight coupling between the expression of an enzyme and the copy number of its encoding gene.<sup>37</sup> It therefore seems reasonable to infer that the effects on anesthesia that we have observed upon reduction in the copy number of certain regions of the genome are the result of reduced expression of genes that lie within that region.

Much work will need to be done to identify the critical genes that lie within the haplo-insufficient regions. However, the process has begun for a few such regions and has resulted in a narrowed focus within the deleted

segment. This advance is a side benefit of the tests we used to confirm that the observed anesthesia effects were indeed the result of reduced copy number of genes in the relevant segment. For example, the two deletions used to challenge the *ED2308* region remove partially overlapping segments of the genome (fig. 5). Although we cannot rule out more complex possibilities, the simplest interpretation of this result is that a critical gene whose expression is responsible for the dosage-sensitive effects on halothane sensitivity lies in the relatively small region of overlap between these two deletions. An even sharper focus is provided by the successful transgenic experiment used to query the *ED1* region. Specifically, the data of table 2 clearly indicate that the critical gene responsible for the CNV effect of the *ED1* deletion is one of the three that are carried by the rescue construct. Modification of the rescuing transgene to eliminate each of these genes in turn offers a straightforward, albeit laborious, method to refine this hypothesis.

Another issue addressed by our dissection of haploinsufficient regions concerns the magnitude of the observed changes in anesthetic sensitivity. We have noted that CNV effects are not large. Could this be the result of a limitation inherent in our methods (e.g., the testing of flies at monotonically increasing concentrations)? This is clearly not the case; when studying null mutants rather than heterozygotes, the same methods have detected larger shifts in sensitivity.<sup>10,12</sup> Moreover, even though the CNV effects are modest, they are not trivial. The steep slopes of anesthetic concentration-response curves mean that even modest changes in potency can produce wholesale changes in population behavior.<sup>38</sup> Nevertheless, the magnitude of the CNV effect suggests that anesthesia is well buffered against subtle changes in gene expression. Before accepting this interpretation, one should also consider the possibility that the true effect of CNV is obscured because deletions may remove genes with opposite influences on anesthesia. According to this scenario, the observed phenotype of a given deletion reflects a haphazard balance between the conflicting effects of reducing copy number of two antagonistic genes. If this were the case, a larger effect might be seen when a particular region of interest is reanalyzed with deletions that only remove part of it. However, such an enhancement was seen neither with the deletions used to subdivide *ED2308* (fig. 5) nor with those that subdivided other intervals from table 1 (Dongyu Guo, Ph.D., Research Fellow, Laboratory of Molecular Biology, National Institute of Mental Health, Bethesda, Maryland; verbal communication, July, 2008). Similarly, table 2 shows that adding back the genes from the segment of the *ED1* region that confers resistance to halothane does not unmask a hypersensitivity to the drug caused by reduced copy number of genes in the remainder of this region. Although these observations cannot conclusively eliminate the possibility that effects



of copy number reduction on anesthesia are blunted by simultaneous manipulation of pairs of genes with opposite effects, our experience suggests that this scenario is uncommon.

At the outset of this work, we could not make a confident prediction either about the frequency with which deletion heterozygotes would show effects on anesthesia or about the magnitude of such effects. On the one hand, we worried that compensatory mechanisms<sup>21</sup> might commonly obscure the effect of reduction in copy number on gene expression. Moreover, even if compensation was not prevalent, we wondered about redundancy in the neural pathways affected by anesthetics. Taken together, these factors made it seem possible that none of the 220 deletion heterozygotes would generate a reliable phenotype, an outcome that would lead us to the conclusion that CNV had little or no impact on anesthesia. On the other hand, we were aware that *Drosophilists* have long used changes in copy number of one gene to enhance effects of a mutation in another gene.<sup>39</sup> Anesthetics are known to undermine the function of many gene products; therefore, we suspected that each of these effects could be subject to enhancement by a separate change in copy number. Moreover, the behavioral endpoint used for our study is obviously the result of many complex locomotor actions, each of which must depend on the functioning of many genes. Reduced copy number of these genes could have effects on locomotor ability too subtle to detect in the absence of anesthesia, but the drug might make them evident. Thus, it also seemed possible that the majority of deletion heterozygotes would have a dramatic anesthetic phenotype, leading us to conclude that CNV had a major effect on anesthesia. Our results inform us that the actual effects of CNV fall between these extremes. Changes in copy number thus take their place alongside point mutations and transposon insertions as part of the spectrum of genetic aberrations that significantly influence anesthesia in flies.<sup>4,6</sup> Current efforts are exploring how CNV influences the effectiveness of various drugs in patient populations.<sup>40</sup> Our experience with *Drosophila* suggests that it would be worthwhile to include volatile anesthetics in such studies.

The authors thank Joy Qun Gu, A.A., Technician, Laboratory of Molecular Biology, National Institute of Mental Health, Bethesda, Maryland, for performing the assays of table 2, Robert Scott, M.Sc., Senior Research Assistant, Laboratory of Molecular Biology, National Institute of Mental Health, Bethesda, Maryland, for help with the figures, and Dongyu Guo, Ph.D., Research Fellow, Laboratory of Molecular Biology, National Institute of Mental Health, Bethesda, Maryland, for his permission to cite unpublished observations and for his comments on the manuscript.

## References

- Freeman JL, Perry GH, Feuk L, Redon R, McCarroll SA, Altshuler DM, Aburatani H, Jones KW, Tyler-Smith C, Hurler ME, Carter NP, Scherer SW, Lee C: Copy number variation: New insights in genome diversity. *Genome Res* 2006; 16:949–61
- Levy S, Sutton G, Ng PC, Feuk L, Halpern AL, Walenz BP, Axelrod N, Huang J, Kirkness EF, Denisov G, Lin Y, MacDonald JR, Pang AW, Shago M, Stockwell TB, Tsiamouri A, Bafna V, Bansal V, Kravitz SA, Busam DA, Beeson KY, McIntosh TC, Remington KA, Abril JF, Gill J, Borman J, Rogers YH, Frazier ME, Scherer SW, Strausberg RL, Venter JC: The diploid genome sequence of an individual human. *PLoS Biol* 2007; 5:e254
- Cohen J: Genomics. DNA duplications and deletions help determine health. *Science* 2007; 317:1315–7
- Gamo S: Studies on target genes of general anesthetics. *Curr Drug Targets* 2002; 3:31–41
- Nash HA: *In vivo* genetics of anesthetic action. *Br J Anesth* 2002; 89:143–55
- Humphrey JA, Hamming KS, Thacker CM, Scott RL, Sedensky MM, Snutch TP, Morgan PG, Nash HA: A putative cation channel and its novel regulator: Cross-species conservation of effects on general anesthesia. *Curr Biol* 2007; 17:624–9
- Tanaka Y, Takase M, Gamo S: Relationship between general anesthesia and memory in *Drosophila* involving the cAMP/PKA pathways and adhesion-related molecules. *Curr Med Chem* 2007; 14:1479–88
- Stocker H, Gallant P: Getting started: An overview on raising and handling *Drosophila*. *Methods Mol Biol* 2008; 420:27–44
- Ryder E, Blows F, Ashburner M, Bautista-Llacer R, Coulson D, Drummond J, Webster J, Gubb D, Gunton N, Johnson G, O'Kane CJ, Huen D, Sharma P, Asztalos Z, Baisch H, Schulze J, Kube M, Kittlaus K, Reuter G, Maroy P, Szidonya J, Rasmuson-Lestander A, Ekstrom K, Dickson B, Hugentobler C, Stocker H, Hafen E, Lepesant JA, Pflugfelder G, Heisenberg M, Mechler B, Serras F, Corominas M, Schneuwly S, Preat T, Roote J, Russell S: The DrosDel collection: A set of P-element insertions for generating custom chromosomal aberrations in *Drosophila melanogaster*. *Genetics* 2004; 167:797–813
- Guan Z, Scott RL, Nash HA: A new assay for the genetic study of general anesthesia in *Drosophila melanogaster*: Use in analysis of mutations in the 12E region. *J Neurogenet* 2000; 14:25–42
- Campbell JL, Nash HA: Volatile general anesthetics reveal a neurobiological role for the white and brown genes of *Drosophila melanogaster*. *J Neurobiol* 2001; 49:339–49
- Cheng Y, Nash HA: Visual mutations reveal opposing effects of illumination on arousal in *Drosophila*. *Genetics* 2008; 178:2413–6
- Nash HA, Scott RL, Lear BC, Allada R: An unusual cation channel mediates photic control of locomotion in *Drosophila*. *Curr Biol* 2002; 12:2152–8
- Alone DP, Scott RL, Nash HA: An ion channel that influences anesthesia sensitivity: Designing a genetic test for assessing a candidate anesthetic target. *Int Cong Ser* 2005; 1283:119–25
- Parks AL, Cook KR, Belvin M, Dompe NA, Fawcett R, Huppert K, Tan LR, Winter CG, Bogart KP, Deal JE, Deal-Herr ME, Grant D, Marcinko M, Miyazaki WY, Robertson S, Shaw KJ, Tabios M, Vysotskaia V, Zhao L, Andrade RS, Edgar KA, Howie E, Killpack K, Milash B, Norton A, Thao D, Whittaker K, Winner MA, Friedman L, Margolis J, Singer MA, Kopczynski C, Curtis D, Kaufman TC, Plowman GD, Duyk G, Francis-Lang HL: Systematic generation of high-resolution deletion coverage of the *Drosophila melanogaster* genome. *Nat Genet* 2004; 36:288–92
- Bachmann A, Knust E: The use of P-element transposons to generate transgenic flies. *Methods Mol Biol* 2008; 420:61–77
- Liu P, Jenkins NA, Copeland NG: A highly efficient recombineering-based method for generating conditional knockout mutations. *Genome Res* 2003; 13:476–84
- Warming S, Costantino N, Court DL, Jenkins NA, Copeland NG: Simple and highly efficient BAC recombineering using galK selection. *Nucleic Acids Res* 2005; 33:e36
- Hoskins RA, Nelson CR, Berman BP, Laverty TR, George RA, Ciesiolka L, Naeemuddin M, Arenson AD, Durbin J, David RG, Tabor PE, Bailey MR, DeShazo DR, Catanese J, Mammoser A, Osoegawa K, de Jong PJ, Celniker SE, Gibbs RA, Rubin GM, Scherer SE: A BAC-based physical map of the major autosomes of *Drosophila melanogaster*. *Science* 2000; 287:2271–4
- Waud DR: On biological assays involving quantal responses. *J Pharm Exper Ther* 1972; 183:577–607
- Veitia RA, Bottani S, Birchler JA: Cellular reactions to gene dosage imbalance: Genomic, transcriptomic and proteomic effects. *Trends Genet* 2008; 24:390–7
- Haag-Liautard C, Dorris M, Maside X, Macaskill S, Halligan DL, Houle D, Charlesworth B, Keightley PD: Direct estimation of per nucleotide and genomic deleterious mutation rates in *Drosophila*. *Nature* 2007; 445:82–5
- Matta JA, Cornett PM, Miyares RL, Abe K, Sahibzada N, Ahern GP: General anesthetics activate a nociceptive ion channel to enhance pain and inflammation. *Proc Natl Acad Sci U S A* 2008; 105:8784–9
- Nakayama T, Penheiter AR, Penheiter SG, Chini EN, Thompson M, Warner DO, Jones KA: Differential effects of volatile anesthetics on M3 muscarinic receptor coupling to the Galphq heterotrimeric G protein. *ANESTHESIOLOGY* 2006; 105:313–24
- Pittson S, Himmel AM, MacIver MB: Multiple synaptic and membrane sites of anesthetic action in the CA1 region of rat hippocampal slices. *BMC Neurosci* 2004; 5:52

26. Campbell DB, Nash HA: Use of *Drosophila* mutants to distinguish among volatile general anesthetics. *Proc Natl Acad Sci USA* 1994; 91:2135-9
27. Gamo S, Tomida J, Dodo K, Keyakidani D, Matakatsu H, Yamamoto D, Tanaka Y: Calreticulin mediates anesthetic sensitivity in *Drosophila melanogaster*. *ANESTHESIOLOGY* 2003; 99:867-75
28. Lee JA, Lupski JR: Genomic rearrangements and gene copy-number alterations as a cause of nervous system disorders. *Neuron* 2006; 52:103-21
29. Perry GH, Ben-Dor A, Tsalenko A, Sampas N, Rodriguez-Revena L, Tran CW, Scheffer A, Steinfeld I, Tsang P, Yamada NA, Park HS, Kim JI, Seo JS, Yakhini Z, Laderman S, Bruhn L, Lee C: The fine-scale and complex architecture of human copy-number variation. *Am J Hum Genet* 2008; 82:685-95
30. Wheeler DA, Srinivasan M, Egholm M, Shen Y, Chen L, McGuire A, He W, Chen YJ, Makhijani V, Roth GT, Gomes X, Tartaro K, Niazi F, Turcotte CL, Irzyk GP, Lupski JR, Chinault C, Song XZ, Liu Y, Yuan Y, Nazareth L, Qin X, Muzny DM, Margulies M, Weinstock GM, Gibbs RA, Rothberg JM: The complete genome of an individual by massively parallel DNA sequencing. *Nature* 2008; 452:872-6
31. Dopman EB, Hartl DL: A portrait of copy-number polymorphism in *Drosophila melanogaster*. *Proc Natl Acad Sci U S A* 2007; 104:19920-5
32. Emerson JJ, Cardoso-Moreira M, Borevitz JO, Long M: Natural selection shapes genome-wide patterns of copy-number polymorphism in *Drosophila melanogaster*. *Science* 2008; 320:1629-31
33. Griffiths AJF, Gelbart WM, Miller JH, Lewontin RC: Modern Genetic Analysis. Edited by Tenney S. New York, W.H. Freeman, Inc., 1999, pp 235-70
34. Alt FW, Kellems RE, Bertino JR, Schimke RT: Selective multiplication of dihydrofolate reductase genes in methotrexate-resistant variants of cultured murine cells. *J Biol Chem* 1978; 253:1357-70
35. Li X, Schuler MA, Berenbaum MR: Molecular mechanisms of metabolic resistance to synthetic and natural xenobiotics. *Annu Rev Entomol* 2007; 52: 231-53
36. Stranger BE, Forrest MS, Dunning M, Ingle CE, Beazley C, Thorne N, Redon R, Bird CP, de Grassi A, Lee C, Tyler-Smith C, Carter N, Scherer SW, Tavare S, Deloukas P, Hurles ME, Dermitzakis ET: Relative impact of nucleotide and copy number variation on gene expression phenotypes. *Science* 2007; 315:848-53
37. O'Brien SJ, Gethmann RC: Segmental aneuploidy as a probe for structural genes in *Drosophila*: Mitochondrial membrane enzymes. *Genetics* 1973; 75: 155-67
38. Franks NP, Honore E: The TREK K2P channels and their role in general anaesthesia and neuroprotection. *Trends Pharmacol Sci* 2004; 25:601-8
39. Hawley RS, Gilliland WD: Sometimes the result is not the answer: The truths and the lies that come from using the complementation test. *Genetics* 2006; 174:5-15
40. Ouahchi K, Lindeman N, Lee C: Copy number variants and pharmacogenomics. *Pharmacogenomics* 2006; 7:25-9
41. Drysdale R: FlyBase: A database for the *Drosophila* research community. *Methods Mol Biol* 2008; 420:45-59
42. Sawitzke JA, Thomason LC, Costantino N, Bubunenko M, Datta S, Court DL: Recombineering: *In vivo* genetic engineering in *E. coli*, *S. enterica*, and beyond. *Methods Enzymol* 2007; 421:171-99
